# Supplementary material for: Systematic analysis of gut microbiota in pregnant women and its correlations with individual heterogeneity
Source: PubMed Central journal article supplement (PMC7486914; doi:10.1038/s41522-020-00142-y), 2020-09-11
Supplement: 41522_2020_142_MOESM2_ESM.pdf [file 41522_2020_142_MOESM2_ESM.pdf]

## Description of Additional Supplementary Files

File: Supplementary Data 1

Description: Summary of metadata.

File: Supplementary Data 2

Description: 29 core genera in the gut microbiota of pregnant women.

File: Supplementary Data 3

Description: 32 core genera in the gut microbiota of nonpregnant women.

File: Supplementary Data 4

Description: 489 core OTUs in the gut microbiota of pregnant women.

File: Supplementary Data 5

Description: 1,517 core KOs and 272 core modules.

File: Supplementary Data 6

Description: Adonis analysis of OTU, genus and KEGG.

File: Supplementary Data 7

Description: Correlation between host parameters and microbial genera.

File: Supplementary Data 8

Description: Age-associated OTUs and modules.

File: Supplementary Data 9

Description: PBMI-associated OTUs and modules.

File: Supplementary Data 10

Description: Resident type-associated OTUs and modules.

File: Supplementary Data 11

Description: GWG random forest regression using the core OTUs profile without added PBMI (left) and with added PBMI (right).

File: Supplementary Data 12

Description: GWG-associated OTUs and modules.

File: Supplementary Data 13

Description: The importance of OTUs to the accuracy of the model of random forest regression of GWG.

File: Supplementary Data 14

Description: Disease-associated OTUs and modules.

File: Supplementary Data 15

Description: Metadata of 1,479 participants of this study.

File: Supplementary Data 16

Description: The core OTUs profile of gut microbiota of pregnant women.

File: Supplementary Data 17

Description: The core OTUs profile of gut microbiota of nonpregnant women.
